# Supplementary material for: Cardiomyocyte-derived circulating extracellular vesicles allow a non-invasive liquid biopsy of myocardium in health and disease
Source: PubMed Central journal article supplement — medRxiv. 2024 Sep 22:2024.09.19.24314009. Preprint. [Version 1] doi: 10.1101/2024.09.19.24314009 (PMC11451713; doi:10.1101/2024.09.19.24314009), 2024-09-22
Supplement: NIHPP2024.09.19.24314009v1-supplement-1.pdf [file NIHPP2024.09.19.24314009v1-supplement-1.pdf]

Supplementary Table and Data Figures:

Table S1: Proteomics discovery data

Table S2: MGH Cohort Discovery- Clinical demographics

| Characteristic           | Heart Failure (n = 15) | Myocardial Infarction (n = 15) | Control (n = 15) |
|--------------------------|------------------------|--------------------------------|------------------|
| Male sex                 | 9                      | 10                             | 5                |
| Female sex               | 6                      | 5                              | 10               |
| Age (years)              | 76 ± 11                | 61 ± 12                        | 51 ± 17          |
| SBP (mmHg)               | 115 ± 14               | 73 ± 12                        | -                |
| DBP (mmHg)               | 73 ± 9                 | 73 ± 12                        | -                |
| Heart rate (bpm)         | 73 ± 12                | 70 ± 10                        | -                |
| Weight (lbs)             | 195 ± 50               | 171 ± 36                       | -                |
| Height (in)              | 67 ± 4                 | 67 ± 4                         | -                |
| BMI (kg/m <sup>2</sup> ) | 31 ± 7                 | 26 ± 4                         | 30 ± 8           |
| LVEF (%)                 | 42 ± 20                | 60 ± 9                         | 66 ± 9           |
| Sodium (mmol/L)          | 140 ± 3                | 140 ± 3                        | -                |
| Creatinine (mg/dL)       | 1.21 ± 0.2             | 1.40 ± 0.3                     | -                |
| NT-proBNP (pg/mL)        | 1695 ± 1700            | 892 ± 1100                     | -                |
| Troponin T (ng/mL)       | -                      | 667 ± 1500                     | -                |

Table S3: MGH Cohort- validation- Clinical demographics

| Characteristic           | Heart Failure (n = 15) | Myocardial Infarction (n = 15) | Control (n = 15) |
|--------------------------|------------------------|--------------------------------|------------------|
| Male sex                 | 7                      | 7                              | 7                |
| Female sex               | 8                      | 8                              | 8                |
| Age (years)              | 65 ± 10                | 64 ± 11                        | 64.5 ± 10.5      |
| SBP (mmHg)               | 118 ± 14               | 122 ± 15                       | -                |
| DBP (mmHg)               | 72 ± 9                 | 74 ± 12                        | -                |
| Heart rate (bpm)         | 75 ± 12                | 72 ± 10                        | -                |
| Weight (lbs)             | 195 ± 50               | 170 ± 36                       | -                |
| Height (in)              | 67 ± 4                 | 67 ± 4                         | -                |
| BMI (kg/m <sup>2</sup> ) | 31.0 ± 7               | 26.5 ± 4                       | 30.4 ± 8         |
| LVEF (%)                 | 35 ± 12                | 57 ± 10                        | 66 ± 9           |
| Sodium (mmol/L)          | 140 ± 3                | 140 ± 3                        | -                |
| Creatinine (mg/dL)       | 1.22 ± 0.2             | 1.13 ± 0.3                     | -                |
| NT-proBNP (pg/mL)        | 1500 ± 1600            | 890 ± 1100                     | -                |
| Troponin T (ng/mL)       | 6 ± 12                 | 885 ± 1490                     | -                |

**Table S4: Clinical demographics of donors and individuals with aortic stenosis (single-nuclear RNA-sequencing)**

| <b>Characteristic</b>    | <b>Aortic Stenosis (n=11)</b> | <b>Control (n=7)</b> |
|--------------------------|-------------------------------|----------------------|
| Age, years               | 65.6 ± 19.3                   | 47.6 ± 15.5          |
| Gender, Male, %          | 55 (6/11)                     | 57 (4/7)             |
| Coronary artery disease  | 73 (8/11)                     | -                    |
| History of heart failure | 100 (11/11)                   | -                    |
| Hypertension, %          | 91 (10/11)                    | -                    |
| Hypertlipidemia, %       | 70 (7/10)                     | -                    |
| Diabetes, %              | 73 (8/11)                     | -                    |

Supplementary Figures: 1-6

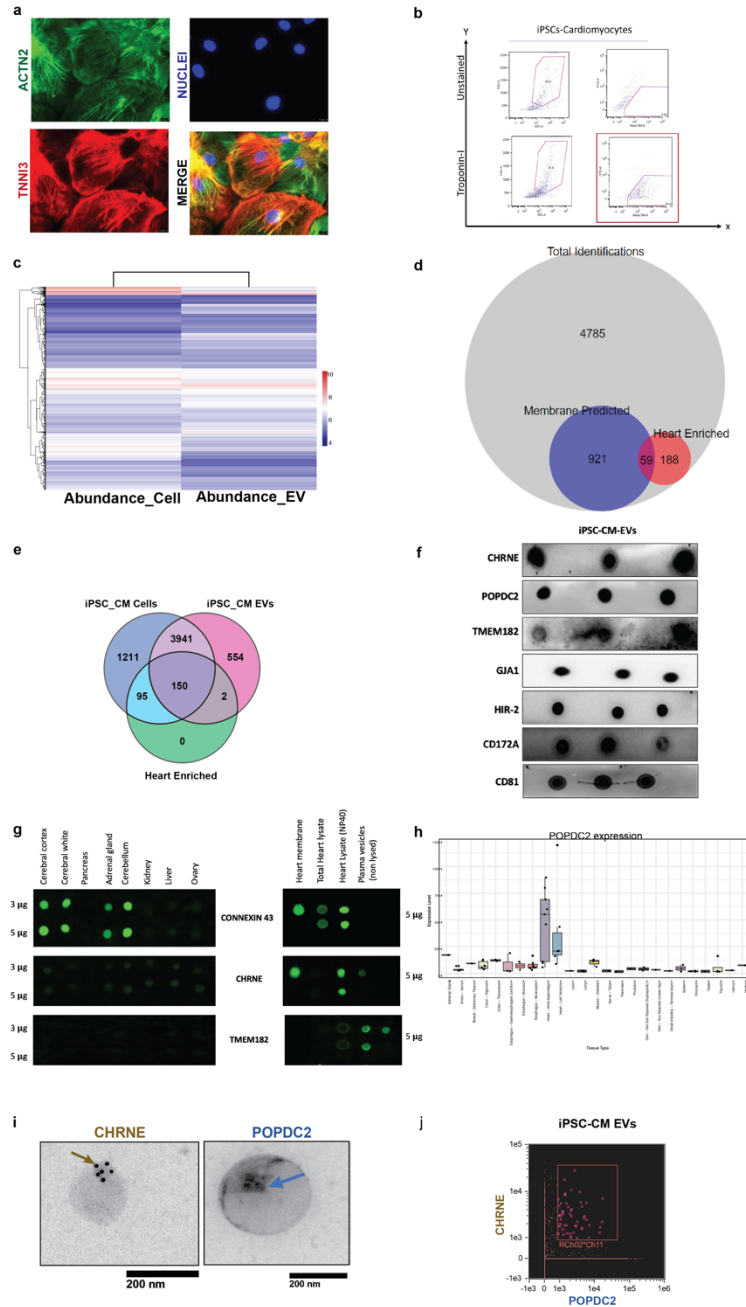

FIGURE S1

**Figure S1. Discovery and experimental validation to identify POPDC2 and CHRNE as cardiomyocyte- EV (Extracellular Vesicle) membrane protein candidates.** Representative **a.** confocal images (showing ACTN2 and TNNI3 positivity) and **b.** Flow-cytometric data (showing Troponin-1 expression) of iPSC-CM (induced Pluripotent Stem Cell-derived Cardiomyocytes) demonstrating cardiac specificity by their expression of classical cardiac markers such as

ACTN2, TNNI3 and TNNT1. **c.** Heatmap showing the abundance of proteins expressed in iPSC-CMs and iPSC-CM-EVs (iPSC-CM Extracellular vesicles) as identified using LC-MS/MS (Liquid Chromatography with tandem mass spectrometry). **d.** Proportional venn diagram showing the intersection of total proteins identified using LC-MS/MS, membrane -localize and heart enriched. **e.** Venn diagram showing 150 targets that were identified using LC-MS/MS present in iPSC-CM, iPSC-CM-EVs and enriched in the heart (from Human Protein Atlas data). **f.** Representative experimentally validated dot blots in iPSC-CMs for various antibodies against proteins identified using the proteomic approach discovery. **g.** Representative tissue-specific dot blots using brain and heart tissue lysates from human samples tested for CONNEXIN43, TMEM182 and CHRNE derived from Computational approach. **h.** Tissue-wise proteomic expression of POPDC2 using GTEx showing elevated expression in heart tissue. **i.** Representative images of POPDC2<sup>+</sup> (blue arrows) and CHRNE<sup>+</sup> (gold arrows) EVs in iPSC-CM-EVs showing single positive (POPDC2<sup>+</sup> CHRNE<sup>-</sup>; POPDC2<sup>-</sup> CHRNE<sup>+</sup>) EVs visualized through Transmission Electron Microscopy with gold particle POPDC2 (5 nm) and CHRNE (12 nm). **j.** POPDC2<sup>+</sup> and CHRNE<sup>+</sup> EVs in iPSC-CMs demonstrated using ImageStream flow cytometry based-methodology (n=3 replicates).

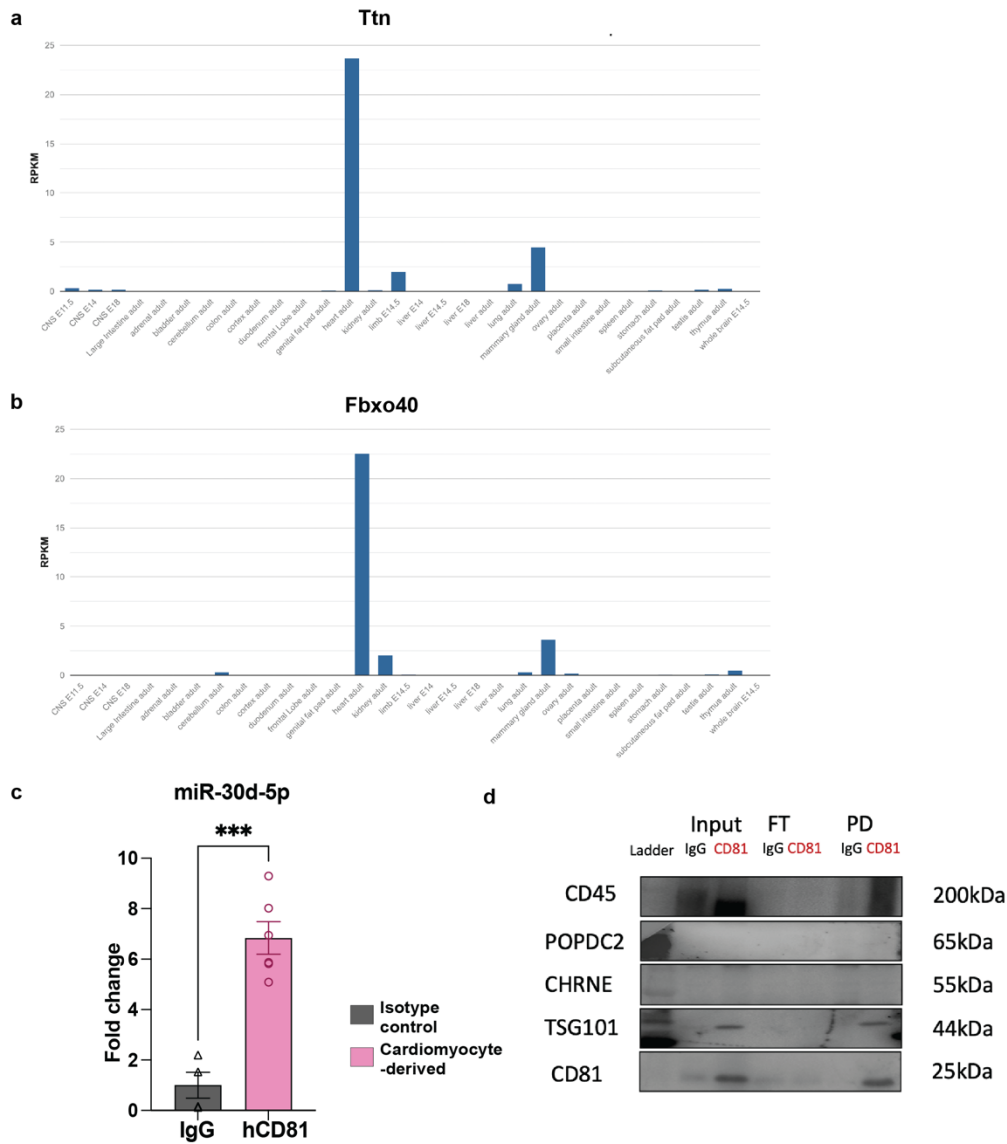

FIGURE S2

**Figure S2. Cardiac-specific transcriptome of CD81 EVs in  $\alpha$ MHC-Cre driven Exomap mouse model.** **a,b.** Representative tissue-wise expression of heart-enriched transcripts (Ttn, Fbxo40) obtained using Mouse ENCODE transcriptomic data from NCBI. **c.** Enrichment of cardiac-specific small RNA miR-30d-5p in immunocaptured cardiac-enriched humanized CD81 EVs compared to the respective isotype control. **d.** Immune tissue-specific Exomap mouse

model does not express POPDC2 and CHRNE as seen using the western blot image showing isolated hsCD81+ EVs (enrichment for CD81 expression in pulled-down samples as well as other EV markers such as Alix and TSG101) from the plasma of mice derived from crossing vav-cre transgenic mice (cre expression in hematopoietic cells ) and ExoMap mice. These EVs were enriched for immune markers (CD45), but not POPDC2 or CHRNE.



Expression of miR-30d as observed in bulk RNA-sequencing showing enrichment in iPSC-CM-EVs compared to iPSC-CMs. **c.** Validation of miR30d expression using digital PCR showing enrichment in iPSC-CM-EVs compared to iPSC-CMs (p-value calculated using student t-test). **d.** Expression of miR-30d in different human tissues showing cardiac enrichment. **e.** Expression of miR-30d in different human biofluids showing expression in human plasma.



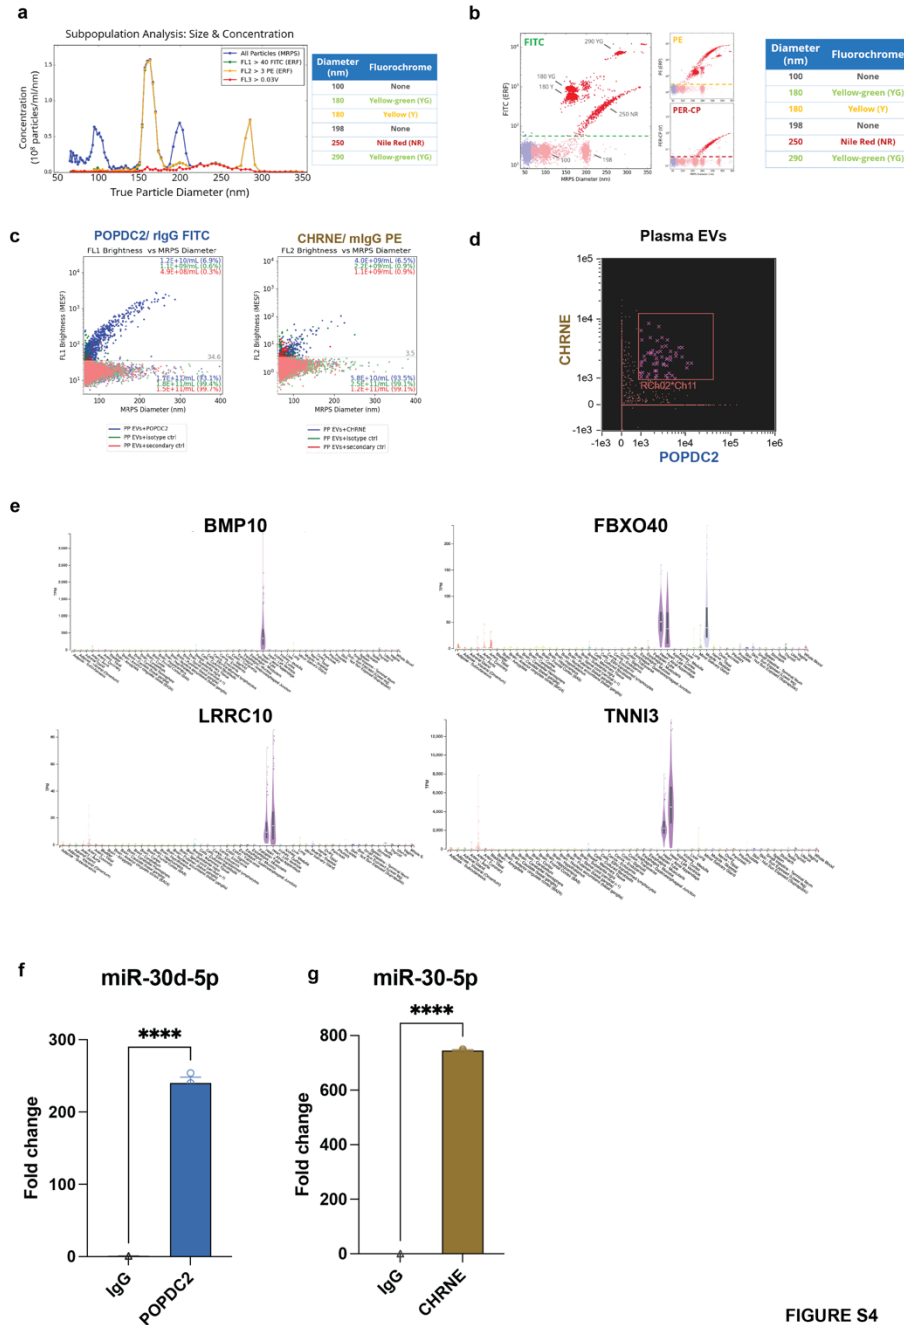

FIGURE S4

**Figure S4. Characterization and profiling POPDC2<sup>+</sup> and CHRNE<sup>+</sup> cardiovesicles in healthy human plasma.**

Appropriate Controls for Fluorescent- Microfluidic Resistive Pulse Sensing (F-MRPS) **a. b.**

demonstrating the size and fluorescence specificity using appropriate bead-controls. **c.** Isotype and secondary antibody only control for POPDC2<sup>+</sup> and CHRNE<sup>+</sup> immunolabelling.

**d.** POPDC2<sup>+</sup> and CHRNE<sup>+</sup> EVs in healthy pooled plasma EVs demonstrated using ImageStream flow cytometry based-methodology. **e.** Tissue-wise transcriptomic expression of mRNA transcripts enriched in POPDC2 and CHRNE cardiovesicles (BMP10, FBXO40, LRRC10, TNNT3) using GTEx showed elevated expression in human heart tissue. Enrichment of cardiac-specific small RNA miR-30d -5p in **f.** POPDC2 and **g.** CHRNE immunocapture from healthy human plasma EVs compared to the respective isotype control.

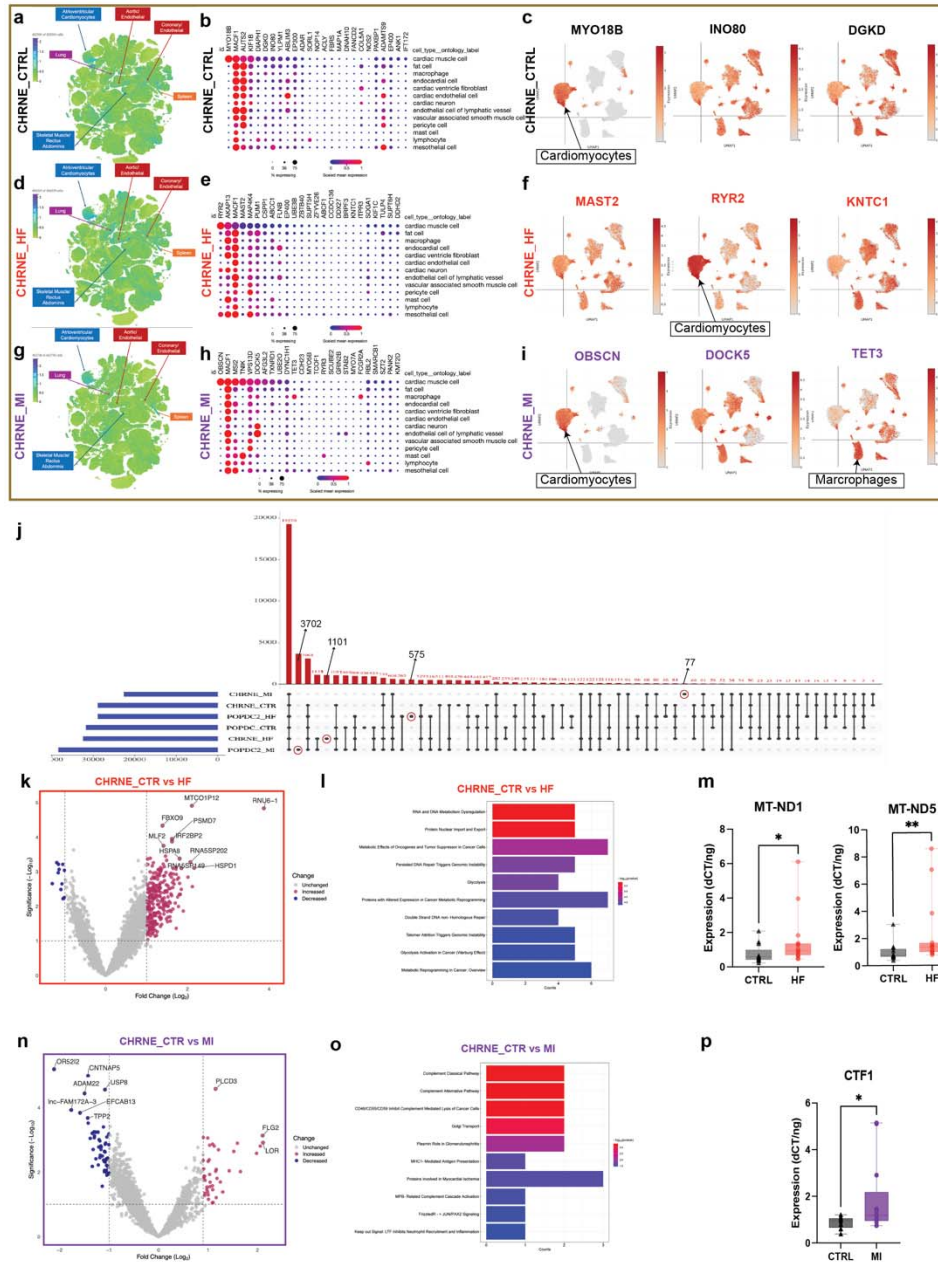

FIGURE S5

**Figure S5. Analysis of CHRNE<sup>+</sup> cardiovesicle transcriptome from HF and MI patients with respect to control patients in the MGH cardiovascular cohort.** Top 25 enriched transcripts (with mean expression threefold greater than standard deviation) from CHRNE<sup>+</sup> Ctrl, HF and MI patients were identified and mapped onto the multiorgan single cell transcriptomic atlas dataset (Tabula Sapiens) (**a**, **d**, **g** respectively) and a single-nuclear dataset of human control (no

cardiovascular disease), dilated cardiomyopathy (**b, c, e, f, h, i**). Cardiovesicle transcripts from control patients mapped to the multi-organ atlas is shown as a target UMAP in **a**, with summary dot-plots and individual target UMAPs from the heart single nuclear dataset shown in **b** and **c** respectively. The same representations for the cardiovesicles from HF are shown in **d, e**, and **f**, while those from MI are depicted in **g, h** and **i**. **j**. Upset plot showing common and unique transcripts in cardiovesicles isolated from Ctrl, HF and MI patients using POPDC2 and CHRNE immunocapture. Genes expressed in 50% of each group of samples are shown. The unique number of genes for each group are indicated using a black arrow with the respective number of genes for that group (3702 genes unique to POPDC2 MI, 1101 unique to CHRNE HF, 575 unique to POPDC2 HF, and 77 genes unique to CHRNE MI). The unique transcripts for each group is indicated using a black arrow with the respective number of transcripts for that group. Transcripts within Cardiovesicles immunocaptured with CHRNE from Ctrl showed high cardiac specificity compared to HF and MI. Volcano plots displaying differentially expressed transcripts (with  $\log FC + 1$  and  $p < 0.01$ ) in CHRNE<sup>+</sup> cardiovesicles from patients with HF compared to control patients (**k**) with pathway enrichment analysis (**l**). **m**. Validation in the MGH validation cohort (n=30) for selected transcripts differentially expressed in HF-CHRNE<sup>+</sup> EVs (MT-ND1,  $p=0.0253$ , MT-ND5,  $p=0.0061$ ) using qRT-PCR normalized to internal and spike-in controls. Similar analysis including volcano plot for differentially expressed transcripts in CHRNE<sup>+</sup> EVs in patients with MI compared to controls (**n**), pathway enrichment analysis (**o**), and experimental validation of select transcripts in the MGH validation cohort (**p**, CTF1,  $p=0.0398$ , n= 30. Significance levels are marked as \*  $p < 0.01$ , \*\*  $p < 0.001$ , \*\*\*  $p < 0.0001$ , calculated using the Kruskal-Wallis test.

It is made available under a [CC-BY-NC-ND 4.0 International license](https://creativecommons.org/licenses/by-nc-nd/4.0/).

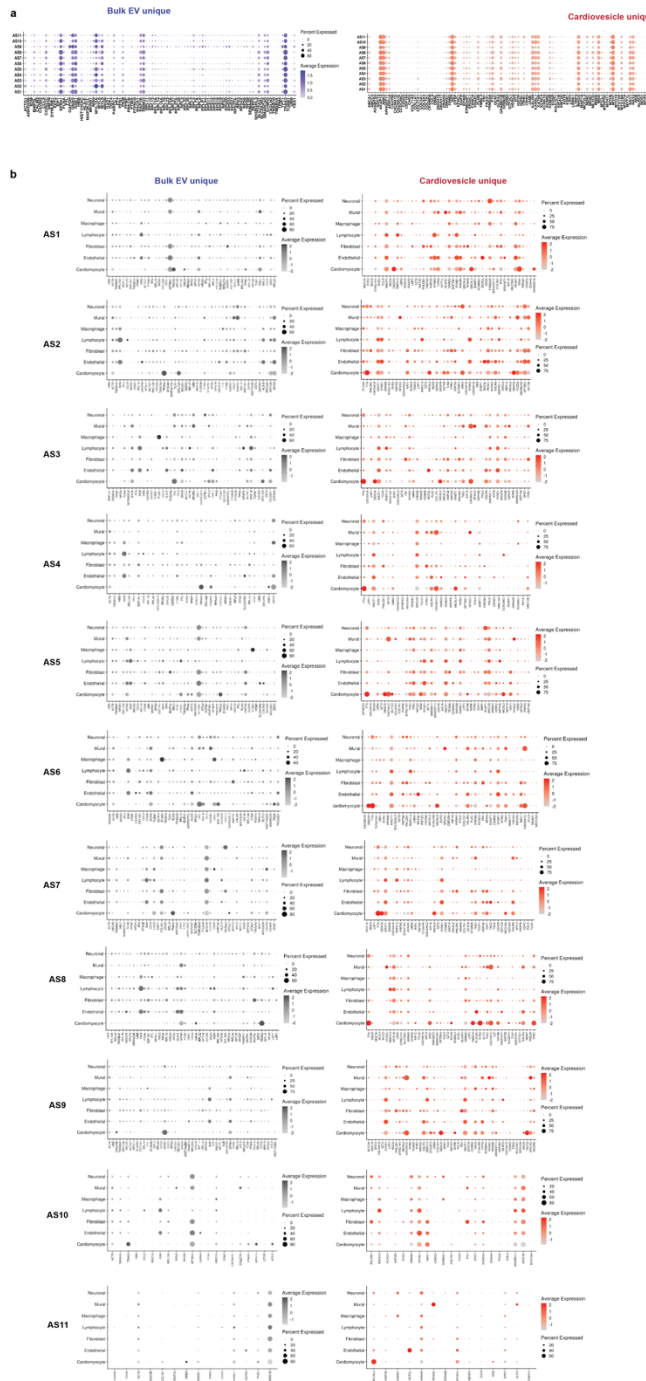

FIGURE S6

**Figure S6. Analysis of cardiovesicle transcriptome from AS patients with respect to control patients in the VUMC cardiovascular cohort. a.** Dot plots showing the expression of all “Bulk EV\_unique” (EV\_AS, 92) and “Cardiovesicle\_unique” transcripts (POPDC2\_AS and POPDC2\_Ctr, 153) in the cardiomyocytes of each AS patient obtained using cardiac tissue

single-nuclear RNA-sequencing demonstrating predominant cardiac specificity of “Cardiovesicle\_unique” transcripts compared to “Bulk EV\_unique” transcripts. **b.** Dot plots showing the expression of Bulk EV\_unique and Cardiovesicle\_unique transcripts in different heart cell types of each AS patient.
